# Supplementary material for: Schizophrenia in the Offspring of Antenatally Depressed Mothers in the Northern Finland 1966 Birth Cohort: Relationship to Family History of Psychosis
Source: Atypon-hosted journal article supplement (doi:10.1176/appi.ajp.2009.09010133), 2009-10-16
Supplement: ajp_167_01_070_01.pdf [file ajp_167_01_070_01.pdf]

**TABLE 1. Cumulative incidences (numbers, N and percentages, %) and crude and adjusted\* odds ratios (OR) and 95% Confidence Intervals (95%CI) of schizophrenia and other psychosis in the offspring of antenatally depressed mothers and with or without parental psychosis in the Northern Finland Birth Cohort 1966 (NFBC 1966)**

|                                                              | No psychosis |      | Any psychosis |      | Schizophrenia               |                            |     |      | Other psychosis             |                            |    |     |                             |                            |
|--------------------------------------------------------------|--------------|------|---------------|------|-----------------------------|----------------------------|-----|------|-----------------------------|----------------------------|----|-----|-----------------------------|----------------------------|
|                                                              | N            | %    | N             | %    | OR <sub>crude</sub> (95%CI) | OR <sub>adj*</sub> (95%CI) | N   | %    | OR <sub>crude</sub> (95%CI) | OR <sub>adj*</sub> (95%CI) | N  | %   | OR <sub>crude</sub> (95%CI) | OR <sub>adj*</sub> (95%CI) |
| Total N = 10 658                                             | 10 507       | 98.6 | 151           | 1.4  |                             |                            | 107 | 1.0  |                             |                            | 44 | 0.4 |                             |                            |
| Maternal mood in pregnancy (N=10 658)                        |              |      |               |      |                             |                            |     |      |                             |                            |    |     |                             |                            |
| - As normal (ref.) (N=9 173, 86.1%)                          | 9 048        | 98.6 | 125           | 1.4  | 1.0                         | 1.0                        | 87  | 0.9  | 1.0                         | 1.0                        | 38 | 0.4 | 1.0                         | 1.0                        |
| - Depressed (N=1 485, 13.9%)                                 | 1 459        | 98.2 | 26            | 1.8  | 1.3 (0.8-2.0)               | 1.3 (0.9-2.0)              | 20  | 1.3  | 1.4 (0.9-2.3)               | 1.5 (0.9-2.4)              | 6  | 0.4 | 1.0 (0.4-2.3)               | 1.0 (0.4-2.4)              |
| Parent with psychosis (Familial Risk)                        |              |      |               |      |                             |                            |     |      |                             |                            |    |     |                             |                            |
| - No psychosis (ref.) (N=10210, 95.8%)                       | 10 081       | 98.7 | 129           | 1.3  | 1.0                         | 1.0                        | 92  | 0.9  | 1.0                         | 1.0                        | 37 | 0.4 | 1.0                         | 1.0                        |
| - Mother (N=262, 2.5%)                                       | 247          | 94.3 | 15            | 5.7  | <b>4.6 (2.6-7.9)</b>        | <b>4.6 (2.6-7.9)</b>       | 10  | 3.8  | <b>4.3 (2.2-8.3)</b>        | <b>4.3 (2.2-8.3)</b>       | 5  | 1.9 | <b>5.3 (2.1-13.6)</b>       | <b>5.4 (2.1-13.8)</b>      |
| - Father (N=194, 1.8%)                                       | 185          | 95.4 | 9             | 4.6  | <b>3.5 (1.8-7.0)</b>        | <b>3.6 (1.8-7.2)</b>       | 6   | 3.1  | <b>3.3 (1.4-7.6)</b>        | <b>3.4 (1.5-7.9)</b>       | 3  | 1.5 | <b>4.1 (1.3-13.3)</b>       | <b>4.0 (1.2-13.2)</b>      |
| - One / Both (N=448, 4.2%)                                   | 426          | 95.1 | 22            | 4.9  | <b>4.0 (2.5-6.4)</b>        | <b>4.1 (2.6-6.5)</b>       | 15  | 3.3  | <b>3.9 (2.2-6.7)</b>        | <b>3.9 (2.2-6.8)</b>       | 7  | 1.6 | <b>4.5 (2.0-10.1)</b>       | <b>4.5 (2.0-10.1)</b>      |
| Parent with psychosis / Maternal depressed mood in pregnancy |              |      |               |      |                             |                            |     |      |                             |                            |    |     |                             |                            |
| - No / No (ref.)                                             | 8 707        | 98.7 | 112           | 1.3  | 1.0                         | 1.0                        | 79  | 0.9  | 1.0                         | 1.0                        | 33 | 0.4 | 1.0                         | 1.0                        |
| - No / Yes                                                   | 1 374        | 98.8 | 17            | 1.2  | 1.0 (0.6-1.6)               | 1.0 (0.6-1.6)              | 13  | 0.9  | 1.0 (0.6-1.9)               | 1.0 (0.6-1.8)              | 4  | 0.3 | 0.8 (0.3-2.2)               | 0.8 (0.3-2.2)              |
| - Yes / No                                                   | 341          | 96.3 | 13            | 3.7  | <b>3.0 (1.7-5.3)</b>        | <b>3.0 (1.7-5.3)</b>       | 8   | 2.3  | <b>2.6 (1.2-5.4)</b>        | <b>2.6 (1.2-5.4)</b>       | 5  | 1.4 | <b>3.9 (1.5-10.0)</b>       | <b>3.9 (1.5-10.1)</b>      |
| - Yes / Yes                                                  | 85           | 90.4 | 9             | 9.6  | <b>8.2 (4.0-16.8)</b>       | <b>8.4 (4.1-17.1)</b>      | 7   | 7.4  | <b>9.1 (4.1-20.2)</b>       | <b>9.4 (4.2-20.9)</b>      | 2  | 2.1 | <b>6.2 (1.5-26.3)</b>       | <b>6.2 (1.5-26.3)</b>      |
| Mother with psychosis / Maternal depressed mood in pregnancy |              |      |               |      |                             |                            |     |      |                             |                            |    |     |                             |                            |
| - No / No (ref.)                                             | 8 856        | 98.7 | 114           | 1.3  | 1.0                         | 1.0                        | 81  | 0.9  | 1.0                         | 1.0                        | 33 | 0.4 | 1.0                         | 1.0                        |
| - No / Yes                                                   | 1404         | 98.5 | 22            | 1.5  | 1.2 (0.8-1.9)               | 1.2 (0.8-1.9)              | 16  | 1.1  | 1.2 (0.7-2.1)               | 1.2 (0.7-2.1)              | 6  | 0.4 | 1.1 (0.5-2.7)               | 1.2 (0.5-2.8)              |
| - Yes / No                                                   | 192          | 94.6 | 11            | 5.4  | <b>4.5 (2.4-8.4)</b>        | <b>4.4 (2.4-8.4)</b>       | 6   | 3.0  | <b>3.4 (1.5-7.9)</b>        | <b>3.4 (1.5-7.9)</b>       | 5  | 2.5 | <b>7.0 (2.7-18.1)</b>       | <b>7.0 (2.7-18.3)</b>      |
| - Yes / Yes                                                  | 55           | 93.2 | 4             | 6.8  | <b>5.7 (2.0-15.9)</b>       | <b>5.7 (2.0-15.9)</b>      | 4   | 6.8  | <b>8.0 (2.8-22.5)</b>       | <b>8.0 (2.8-22.8)</b>      | 0  | 0.0 | -                           | -                          |
| Father with psychosis / Maternal depressed mood in pregnancy |              |      |               |      |                             |                            |     |      |                             |                            |    |     |                             |                            |
| - No / No (ref.)                                             | 8 895        | 98.6 | 122           | 1.4  | 1.0                         | 1.0                        | 85  | 0.9  | 1.0                         | 1.0                        | 37 | 0.4 | 1.0                         | 1.0                        |
| - No / Yes                                                   | 1 427        | 98.6 | 20            | 1.4  | 1.0 (0.6-1.6)               | 1.0 (0.6-1.6)              | 16  | 1.1  | 1.2 (0.7-2.0)               | 1.2 (0.7-2.0)              | 4  | 0.3 | 0.7 (0.2-1.9)               | 0.7 (0.2-1.9)              |
| - Yes / No                                                   | 153          | 98.1 | 3             | 1.9  | 1.4 (0.5-4.5)               | 1.4 (0.5-4.6)              | 2   | 1.3  | 1.4 (0.3-5.6)               | 1.4 (0.3-5.7)              | 1  | 0.6 | 1.6 (0.2-11.5)              | 1.6 (0.2-11.5)             |
| - Yes / Yes                                                  | 32           | 84.2 | 6             | 15.8 | <b>13.7 (5.6-33.3)</b>      | <b>14.3 (5.9-35.0)</b>     | 4   | 10.5 | <b>13.1 (4.5-37.8)</b>      | <b>14.2 (4.9-41.2)</b>     | 2  | 5.3 | <b>15.0 (3.5-65.0)</b>      | <b>14.5 (3.3-62.8)</b>     |

\*Adjusted for sex and perinatal complications  
 Statistically significant differences are **in bold**.

**TABLE 2. Cumulative incidences (numbers, N and percentages, %) of schizophrenia and other psychosis in the offspring of antenatally depressed mothers and with or without parental psychosis in the NFBC 1966: Results of Chi-square tests  $X^2$  and p-values**

|                                                              | No psychosis |      | Any psychosis |      | Schizophrenia                    |                                 |     |      | Other psychosis                  |                                 |    |     |                                  |                                 |
|--------------------------------------------------------------|--------------|------|---------------|------|----------------------------------|---------------------------------|-----|------|----------------------------------|---------------------------------|----|-----|----------------------------------|---------------------------------|
|                                                              | N            | %    | N             | %    | $X^2_{crude}$ (Wald);<br>p-value | $X^2_{adj*}$ (Wald);<br>p-value | N   | %    | $X^2_{crude}$ (Wald);<br>p-value | $X^2_{adj*}$ (Wald);<br>p-value | N  | %   | $X^2_{crude}$ (Wald);<br>p-value | $X^2_{adj*}$ (Wald);<br>p-value |
| Total N = 10 658                                             | 10 507       | 98.6 | 151           | 1.4  |                                  |                                 | 107 | 1.0  |                                  |                                 | 44 | 0.4 |                                  |                                 |
| Maternal mood in pregnancy (N=10 658)                        |              |      |               |      |                                  |                                 |     |      |                                  |                                 |    |     |                                  |                                 |
| - As normal (ref.) (N=9 173, 86.1%)                          | 9 048        | 98.6 | 125           | 1.4  | -; -                             | -; -                            | 87  | 0.9  | -; -                             | -; -                            | 38 | 0.4 | -; -                             | -; -                            |
| - Depressed (N=1 485, 13.9%)                                 | 1 459        | 98.2 | 26            | 1.8  | 1.4; 0.242                       | 1.3; 0.258                      | 20  | 1.3  | 2.0; 0.155                       | 1.8; 0.177                      | 6  | 0.4 | 0.002; 0.962                     | 0.001; 0.980                    |
| Parent with psychosis (Familial Risk)                        |              |      |               |      |                                  |                                 |     |      |                                  |                                 |    |     |                                  |                                 |
| - No psychosis (ref.) (N=10210, 95.8%)                       | 10 081       | 98.7 | 129           | 1.3  | -; -                             | -; -                            | 92  | 0.9  | -; -                             | -; -                            | 37 | 0.4 | -; -                             | -; -                            |
| - Mother (N=262, 2.5%)                                       | 247          | 94.3 | 15            | 5.7  | <b>29.6; &lt;0.001</b>           | <b>29.6; &lt;0.001</b>          | 10  | 3.8  | <b>18.5; &lt;0.001</b>           | <b>18.3; &lt;0.001</b>          | 5  | 1.9 | <b>12.2; &lt;0.001</b>           | <b>12.3; &lt;0.001</b>          |
| - Father (N=194, 1.8%)                                       | 185          | 95.4 | 9             | 4.6  | <b>12.9; &lt;0.001</b>           | <b>13.2; &lt;0.001</b>          | 6   | 3.1  | <b>7.9; 0.005</b>                | <b>8.2; 0.004</b>               | 3  | 1.5 | <b>5.4; 0.020</b>                | <b>5.4; 0.021</b>               |
| - One / Both (N=448, 4.2%)                                   | 426          | 95.1 | 22            | 4.9  | <b>35.0; &lt;0.001</b>           | <b>35.3; &lt;0.001</b>          | 15  | 3.3  | <b>22.8; &lt;0.001</b>           | <b>23.0; &lt;0.001</b>          | 7  | 1.6 | <b>13.0; &lt;0.001</b>           | <b>13.0; &lt;0.001</b>          |
| Parent with psychosis / Maternal depressed mood in pregnancy |              |      |               |      |                                  |                                 |     |      |                                  |                                 |    |     |                                  |                                 |
| - No / No (ref.)                                             | 8 707        | 98.7 | 112           | 1.3  | -; -                             | -; -                            | 79  | 0.9  | -; -                             | -; -                            | 33 | 0.4 | -; -                             | -; -                            |
| - No / Yes                                                   | 1 374        | 98.8 | 17            | 1.2  | 0.02; 0.882                      | 0.03; 0.853                     | 13  | 0.9  | 0.02; 0.889                      | 0.01; 0.942                     | 4  | 0.3 | 0.2; 0.619                       | 0.2; 0.634                      |
| - Yes / No                                                   | 341          | 96.3 | 13            | 3.7  | <b>13.3; &lt;0.001</b>           | <b>13.3; &lt;0.001</b>          | 8   | 2.3  | <b>6.4; 0.011</b>                | <b>6.4; 0.011</b>               | 5  | 1.4 | <b>7.8; 0.005</b>                | <b>7.9; 0.005</b>               |
| - Yes / Yes                                                  | 85           | 90.4 | 9             | 9.6  | <b>33.7; &lt;0.001</b>           | <b>34.1; &lt;0.001</b>          | 7   | 7.4  | <b>29.1; &lt;0.001</b>           | <b>29.6; &lt;0.001</b>          | 2  | 2.1 | <b>6.1; 0.013</b>                | <b>6.1; 0.013</b>               |
| Mother with psychosis / Maternal depressed mood in pregnancy |              |      |               |      |                                  |                                 |     |      |                                  |                                 |    |     |                                  |                                 |
| - No / No (ref.)                                             | 8 856        | 98.7 | 114           | 1.3  | -; -                             | -; -                            | 81  | 0.9  | -; -                             | -; -                            | 33 | 0.4 | -; -                             | -; -                            |
| - No / Yes                                                   | 1404         | 98.5 | 22            | 1.5  | 0.7; 0.402                       | 0.6; 0.421                      | 16  | 1.1  | 0.6; 0.424                       | 0.5; 0.463                      | 6  | 0.4 | 0.1; 0.758                       | 0.1; 0.740                      |
| - Yes / No                                                   | 192          | 94.6 | 11            | 5.4  | <b>21.2; &lt;0.001</b>           | <b>21.1; &lt;0.001</b>          | 6   | 3.0  | <b>8.2; 0.004</b>                | <b>8.0; 0.005</b>               | 5  | 2.5 | <b>16.0; &lt;0.001</b>           | <b>16.1; &lt;0.001</b>          |
| - Yes / Yes                                                  | 55           | 93.2 | 4             | 6.8  | <b>10.8; 0.001</b>               | <b>10.8; 0.001</b>              | 4   | 6.8  | <b>15.3; &lt;0.001</b>           | <b>15.4; &lt;0.001</b>          | 0  | 0.0 | -; -                             | -; -                            |
| Father with psychosis / Maternal depressed mood in pregnancy |              |      |               |      |                                  |                                 |     |      |                                  |                                 |    |     |                                  |                                 |
| - No / No (ref.)                                             | 8 895        | 98.6 | 122           | 1.4  | -; -                             | -; -                            | 85  | 0.9  | -; -                             | -; -                            | 37 | 0.4 | -; -                             | -; -                            |
| - No / Yes                                                   | 1 427        | 98.6 | 20            | 1.4  | 0.01; 0.929                      | 0.01; 0.965                     | 16  | 1.1  | 0.3; 0.560                       | 0.3; 0.612                      | 4  | 0.3 | 0.6; 0.454                       | 0.5; 0.5                        |
| - Yes / No                                                   | 153          | 98.1 | 3             | 1.9  | 0.4; 0.545                       | 0.4; 0.535                      | 2   | 1.3  | 0.2; 0.663                       | 0.2; 0.654                      | 1  | 0.6 | 0.2; 0.657                       | 0.2; 0.7                        |
| - Yes / Yes                                                  | 32           | 84.2 | 6             | 15.8 | <b>33.2; &lt;0.001</b>           | <b>34.1; &lt;0.001</b>          | 4   | 10.5 | <b>22.6; &lt;0.001</b>           | <b>23.6; &lt;0.001</b>          | 2  | 5.3 | <b>13.2; &lt;0.001</b>           | <b>12.8; &lt;0.001</b>          |

\*Adjusted for sex and perinatal complications  
Statistically significant differences are **in bold**.

**TABLE 3. Risk for schizophrenia and other psychosis in offspring with parental psychosis where maternal mood during pregnancy was rated as depressed versus those where maternal mood was not depressed (crude and adjusted\* odds ratios OR, 95% Confidence Intervals 95%CI, Chi-square tests X<sup>2</sup> and p-values) in the NFBC 1966**

| Subgroups with parental psychosis                      | Any psychosis                   |                                              |                  |                                 |                                           |              | Schizophrenia                   |                                              |              |                                 |                                           |              | Other Psychosis                 |                                              |              |                                 |                                           |         |
|--------------------------------------------------------|---------------------------------|----------------------------------------------|------------------|---------------------------------|-------------------------------------------|--------------|---------------------------------|----------------------------------------------|--------------|---------------------------------|-------------------------------------------|--------------|---------------------------------|----------------------------------------------|--------------|---------------------------------|-------------------------------------------|---------|
|                                                        | OR <sub>crude</sub><br>(95% CI) | X <sup>2</sup> <sub>crude</sub><br>(Pearson) | p-value          | OR <sub>adj</sub> *<br>(95% CI) | X <sup>2</sup> <sub>adj</sub> *<br>(Wald) | p-value      | OR <sub>crude</sub><br>(95% CI) | X <sup>2</sup> <sub>crude</sub><br>(Pearson) | p-value      | OR <sub>adj</sub> *<br>(95% CI) | X <sup>2</sup> <sub>adj</sub> *<br>(Wald) | p-value      | OR <sub>crude</sub><br>(95% CI) | X <sup>2</sup> <sub>crude</sub><br>(Pearson) | p-value      | OR <sub>adj</sub> *<br>(95% CI) | X <sup>2</sup> <sub>adj</sub> *<br>(Wald) | p-value |
| <b>Parent with psychosis (N=448)</b>                   |                                 |                                              |                  |                                 |                                           |              |                                 |                                              |              |                                 |                                           |              |                                 |                                              |              |                                 |                                           |         |
| No maternal depressed mood in pregnancy (ref) (N= 354) | 1.0                             |                                              |                  | 1.0                             |                                           |              | 1.0                             |                                              |              | 1.0                             |                                           |              |                                 |                                              |              | 1.0                             |                                           |         |
| Maternal depressed mood in pregnancy (N= 94)           | <b>2.8</b><br><b>(1.1-6.7)</b>  | <b>5.5</b>                                   | <b>0.019</b>     | <b>2.8</b><br><b>(1.1-6.7)</b>  | <b>5.1</b>                                | <b>0.024</b> | <b>3.5</b><br><b>(1.2-9.9)</b>  | <b>6.3</b>                                   | <b>0.012</b> | <b>3.6</b><br><b>(1.3-10.2)</b> | <b>5.7</b>                                | <b>0.017</b> | 1.6<br>(0.3-8.4)                | 0.3                                          | 0.572        | 1.6<br>(0.3-8.4)                | 0.3                                       | 0.579   |
| <b>Mother with psychosis (N=262)</b>                   |                                 |                                              |                  |                                 |                                           |              |                                 |                                              |              |                                 |                                           |              |                                 |                                              |              |                                 |                                           |         |
| No maternal depressed mood in pregnancy (ref) (N=203)  | 1.0                             |                                              |                  | 1.0                             |                                           |              | 1.0                             |                                              |              | 1.0                             |                                           |              | 1.0                             |                                              |              | 1.0                             |                                           |         |
| Maternal depressed mood in pregnancy (N=59)            | 1.3<br>(0.4-4.1)                | 0.2                                          | 0.692            | 1.3<br>(0.4-4.2)                | 0.2                                       | 0.685        | 2.3<br>(0.6-8.5)                | 1.7                                          | 0.191        | 2.4<br>(0.6-8.8)                | 1.7                                       | 0.192        | -                               | -                                            | -            | -                               | -                                         | -       |
| <b>Father with psychosis (N=194)</b>                   |                                 |                                              |                  |                                 |                                           |              |                                 |                                              |              |                                 |                                           |              |                                 |                                              |              |                                 |                                           |         |
| No maternal depressed mood in pregnancy (ref) (N=156)  | 1.0                             |                                              |                  | 1.0                             |                                           |              | 1.0                             |                                              |              | 1.0                             |                                           |              | 1.0                             |                                              |              | 1.0                             |                                           |         |
| Maternal depressed mood in pregnancy (N=38)            | <b>9.6</b><br><b>(2.3-40.3)</b> | <b>13.3</b>                                  | <b>&lt;0.001</b> | <b>9.0</b><br><b>(2.1-37.9)</b> | <b>8.9</b>                                | <b>0.003</b> | <b>9.6</b><br><b>(1.7-54.5)</b> | <b>9.3</b>                                   | <b>0.002</b> | <b>9.0</b><br><b>(1.6-51.7)</b> | <b>6.1</b>                                | <b>0.013</b> | 9.6<br>(0.8-108.7)              | 4.9                                          | <b>0.028</b> | 8.8<br>(0.8-100.4)              | 3.1                                       | 0.080   |

\*Adjusted for sex and perinatal complications  
Statistically significant differences are **in bold**.
